# Supplementary material for: Periacetabular osteotomy of the hip: an 8-year follow-up of 96 consecutive cases
Source: Research Square preprint supplement (doi:10.21203/rs.3.rs-8058147/v1), 2025-12-02
Supplement: Supplementary file 1 [file 2f2e8deb834a5002c03e0bc4.docx]

**Table 2.** Cox regression to evaluate factors associated with risk for reoperation with THA

| **Variable** | | **n=** | **Reoperation** | | | | **Univariable** | | **Multivariable** | | | |
| --- | --- | --- | --- | --- | --- | --- | --- | --- | --- | --- | --- | --- |
|  | |  | **n= (%)** | | | **HR (95%CI)** | | **HR (95%CI)** | | | |
| **Age** | |  | | |  |  | |  |  | |  | |
| < 30 years  ≥ 30 years | | 46  50 | | 6 (13)  15 (30) | | 1 (reference)  2.8 (1.1-7.3) | |  | 1 (reference)  5.2 (1.5-18) | |  | |
| **Preoperative Tönnis grade1** | |  | |  | |  | |  |  | |  | |
| 0  1  2 | | 77  16  2 | | 14 (18)  5 (31)  1 (50) | | 1 (reference)  1.7 (0.6-4.8)  6.0 (0.7-48) | |  | 1 (reference)  1.8 (0.6-5.0)  24 (2.1-247) | |  | |
| **Preoperative LCHA1** | |  | |  | |  | |  |  | |  | |
| <20° Dysplastic  20-25° Borderline  >25° Normal | 75  14  6 | | 18 (24)  2 (14)  0 (0) | | 1 (reference)  0.8 (0.2-3.3)  0 | |  | 1 (reference)  0.6 (0.1-2.6)  0 | |  | |
|  | |  |  | | | |  |  |  |  | | |

THA = total hip arthroplasty, HR = hazard ratio, CI = confidence interval, LHCA = lateral hip center angle

1 one missing case
